# Supplementary material for: Heterometallic Chain Compounds of Tetrakis(µ-carboxylato)diruthenium and Tetracyanidoaurate
Source: MDPI journal article supplement (doi:10.3390/magnetochemistry8050048), 2022-05-02
Supplement: s1 [file s1]

Supplementary Data

*Article*

# Heterometallic Chain Compounds of Tetrakis( $\mu$ -carboxylato)diruthenium and Tetracyanidoaurate

Masahiro Mikuriya <sup>1,\*</sup>, Yusuke Tanaka <sup>1</sup>, Daisuke Yoshioka <sup>1</sup>, Motohiro Tsuboi <sup>1</sup>, Hidekazu Tanaka <sup>2</sup>, and Makoto Handa <sup>2,\*</sup>

<sup>1</sup> School of Biological and Environmental Sciences, Kwansei Gakuin University, 2-1 Gakuen, Sanda 669-1337, Japan; [you06you15@gmail.co.jp](mailto:you06you15@gmail.co.jp) (Y.T.); [yoshi0431@gmail.com](mailto:yoshi0431@gmail.com) (D.Y); [tsuboimot@kwansei.ac.jp](mailto:tsuboimot@kwansei.ac.jp) (M.T.)

<sup>2</sup> Department of Chemistry, Graduate School of Natural Science and Technology, Shimane University, Matsue 690-8504, Japan; [hidekazu@riko.shimane-u.ac.jp](mailto:hidekazu@riko.shimane-u.ac.jp) (H.T.); [handam@riko.shimane-u.ac.jp](mailto:handam@riko.shimane-u.ac.jp) (M.H.)

\* Correspondence: [junpei@kwansei.ac.jp](mailto:junpei@kwansei.ac.jp)

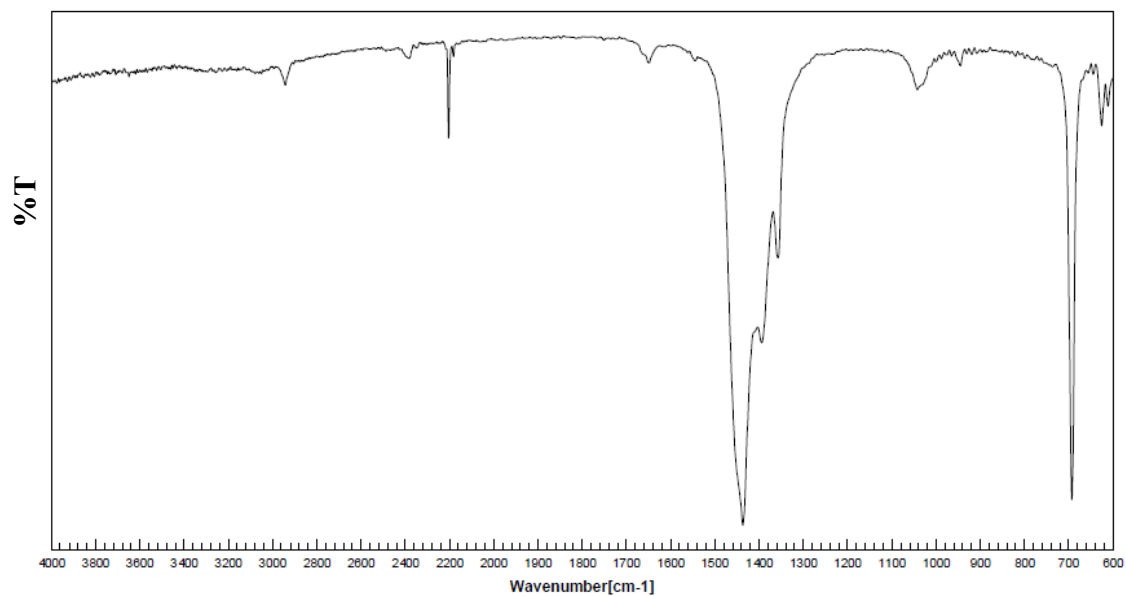

**Figure S1.** Infrared spectra of  $[\text{Ru}_2(\text{CH}_3\text{COO})_4\text{Au}(\text{CN})_4]_n$  (1),

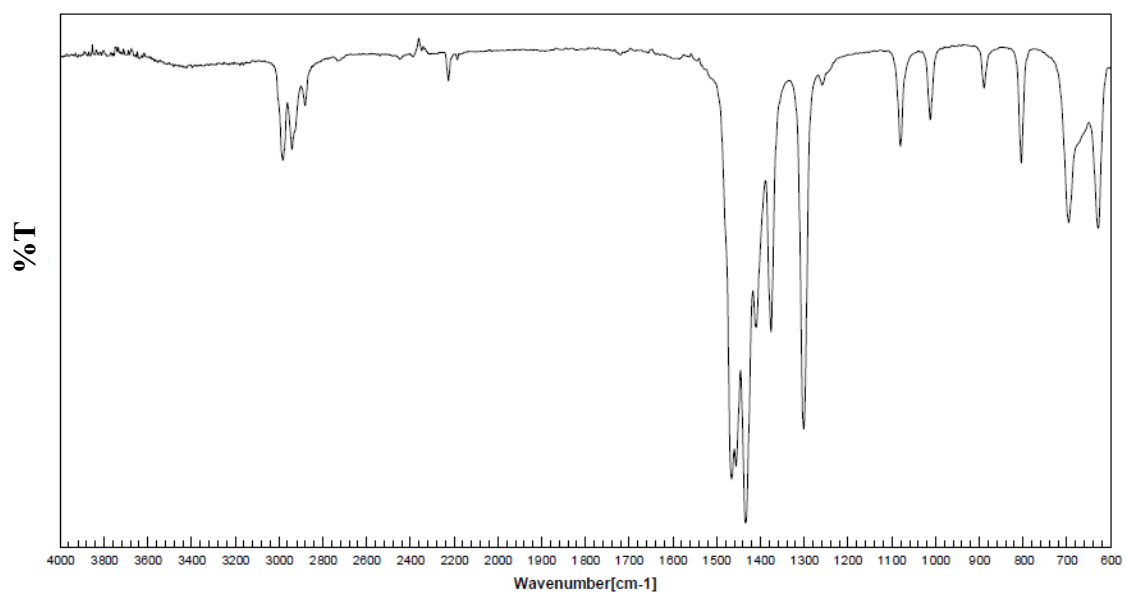

**Figure S2.** Infrared spectra of  $[\text{Ru}_2(\text{C}_2\text{H}_5\text{COO})_4\text{Au}(\text{CN})_4]_n$  (2).

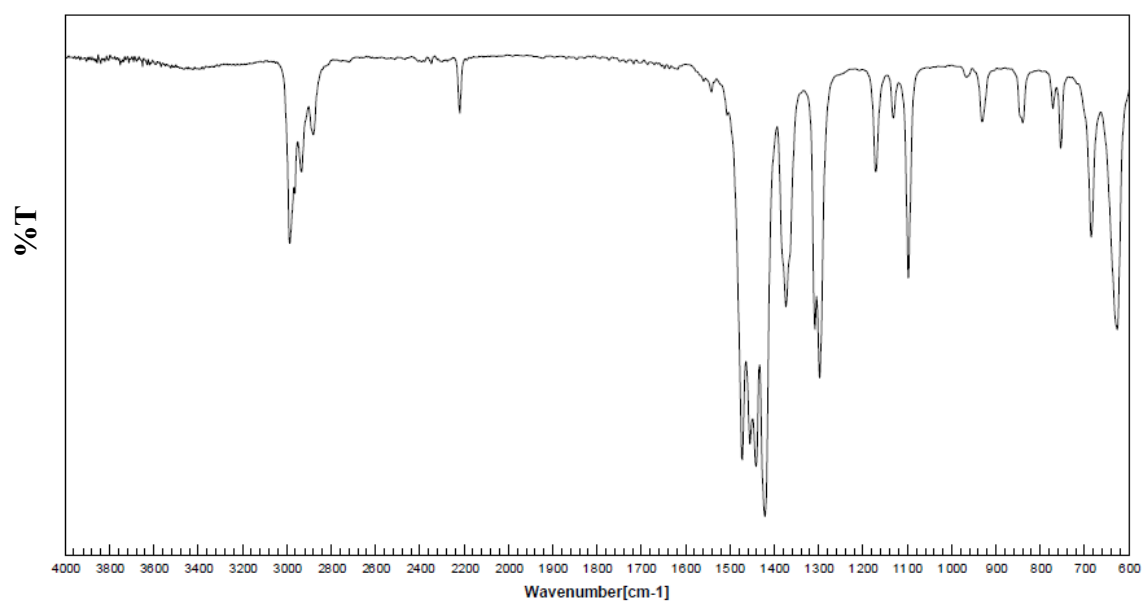

**Figure S3.** Infrared spectra of  $[\text{Ru}_2(i\text{-C}_3\text{H}_7\text{COO})_4\text{Au}(\text{CN})_4]_n$  (**3**).

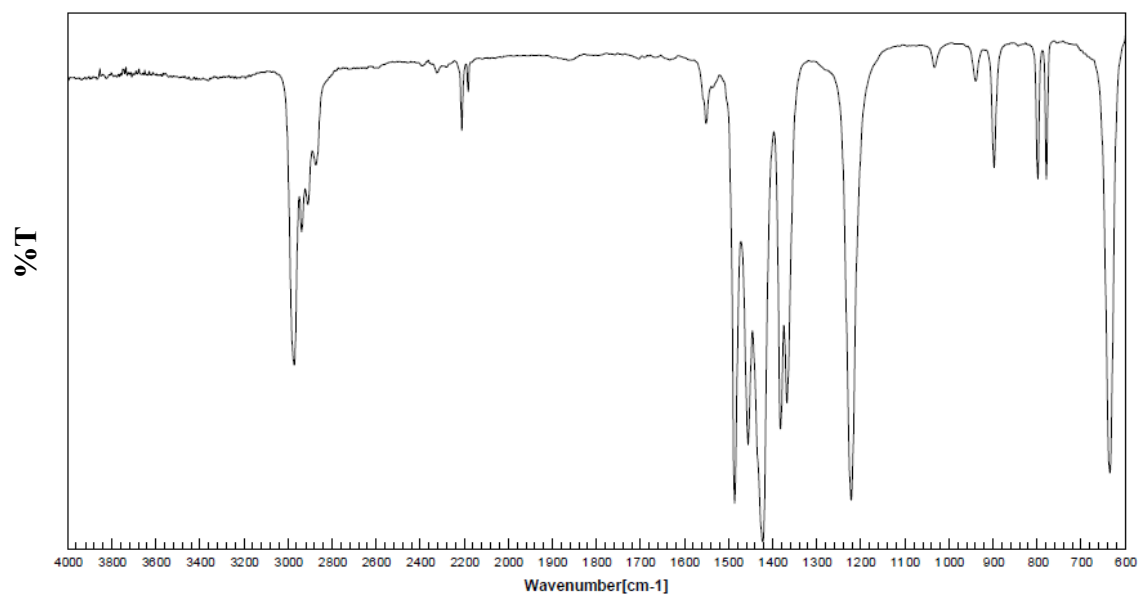

**Figure S4.** Infrared spectra of  $[\text{Ru}_2(t\text{-C}_4\text{H}_9\text{COO})_4\text{Au}(\text{CN})_4]_n$  (**4**).

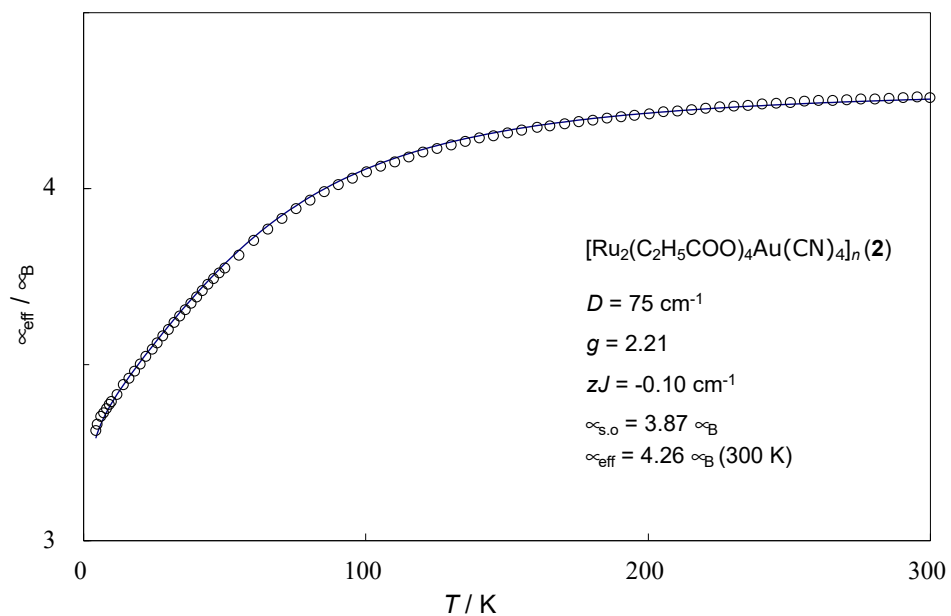

**Figure S5.** Variable temperature of magnetic moment  $\mu_{\text{eff}}$  for  $[\text{Ru}_2(\text{C}_2\text{H}_5\text{COO})_4\text{Au}(\text{CN})_4]_n$  (2). The solid black line was calculated and drawn with the parameter values described in the text.

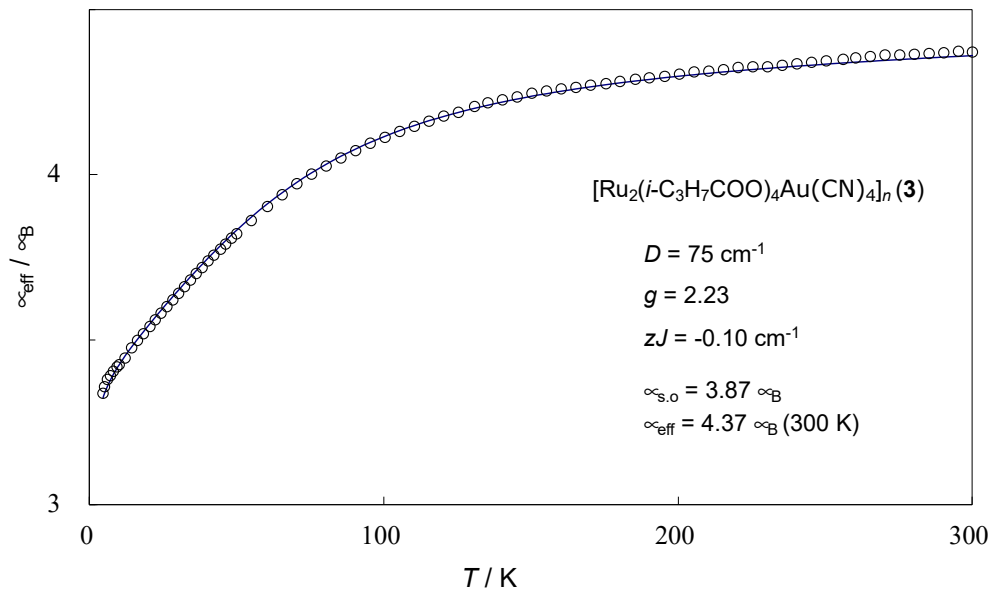

**Figure S6.** Variable temperature of magnetic moment  $\mu_{\text{eff}}$  for  $[\text{Ru}_2(i\text{-C}_3\text{H}_7\text{COO})_4\text{Au}(\text{CN})_4]_n$  (3). The solid black line was calculated and drawn with the parameter values described in the text.

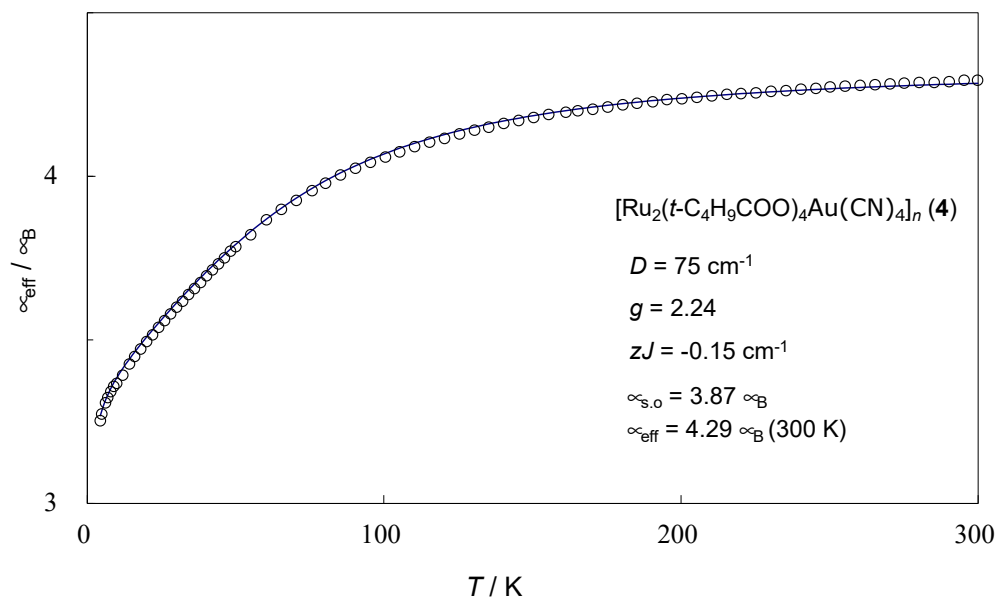

**Figure S7.** Variable temperature of magnetic moment  $\mu_{\text{eff}}$  for  $[\text{Ru}_2(t\text{-C}_4\text{H}_9\text{COO})_4\text{Au}(\text{CN})_4]_n$  (4). The solid black line was calculated and drawn with the parameter values described in the text.

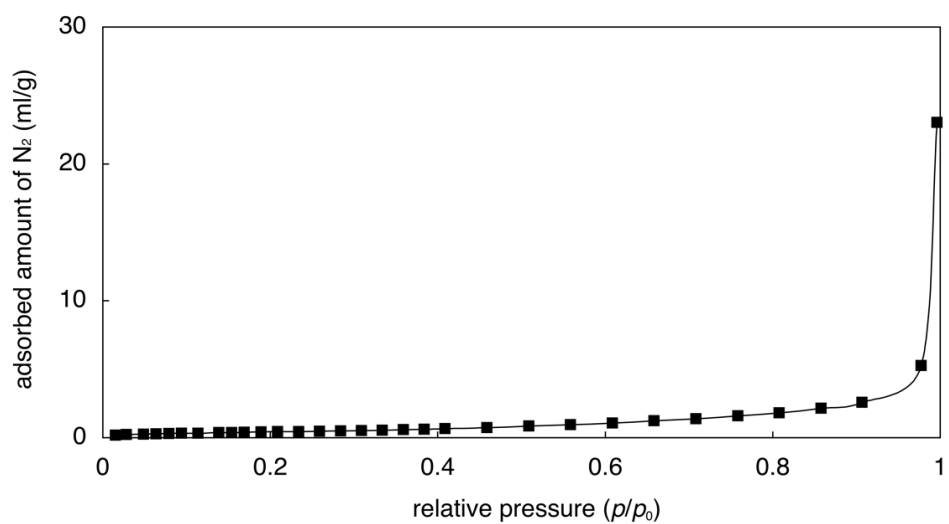

**Figure S8.** Nitrogen adsorption isotherm of  $[\text{Ru}_2(\text{C}_2\text{H}_5\text{COO})_4\text{Au}(\text{CN})_4]_n$  (2). Solid line is guide for the eye.

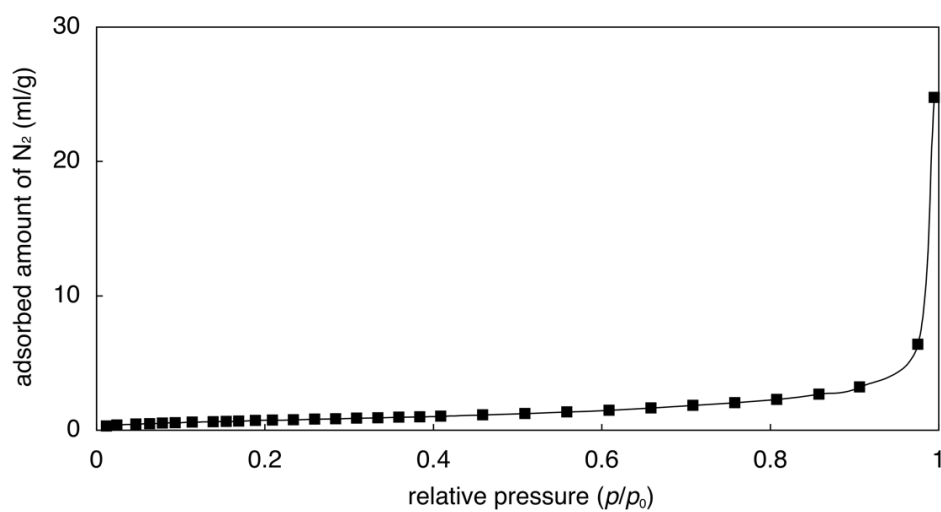

**Figure S9.** Nitrogen adsorption isotherm of  $[Ru_2(i-C_3H_7COO)_4Au(CN)_4]_n$  (**3**). Solid line is guide for the eye.

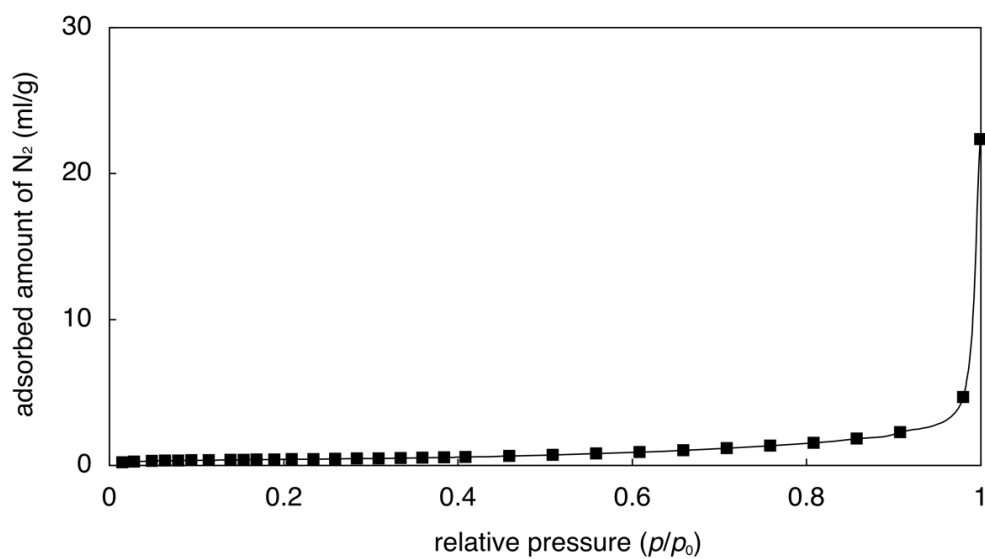

**Figure S10.** Nitrogen adsorption isotherm of  $[Ru_2(t-C_4H_9COO)_4Au(CN)_4]_n$  (**4**). Solid line is guide for the eye.

**Table S1.** Some selected structural parameters of the present complexes **1–4**.

| Com-<br>plexes | Ru–Ru / Å                                                                                                                                                          | Au–C / Å                                                                      | Ru–O <sub>eq</sub> (RCO <sub>2</sub> ) / Å | Ru–N <sub>ax</sub> / Å                                                                                 | Ru–Ru–N <sub>ax</sub> / °                                                 |
|----------------|--------------------------------------------------------------------------------------------------------------------------------------------------------------------|-------------------------------------------------------------------------------|--------------------------------------------|--------------------------------------------------------------------------------------------------------|---------------------------------------------------------------------------|
| <b>1</b>       | Ru1–Ru1 <sup>ii</sup> 2.2695(7)<br>ii: ( <i>x</i> , <i>x</i> – <i>y</i> , 7/6– <i>z</i> )                                                                          | Au1–C7 1.991(4)                                                               | Ru1–O1 2.023(3)                            | Ru1–N1 2.286(3)                                                                                        | Ru1 <sup>ii</sup> –Ru1–N1 172.34(9)                                       |
|                |                                                                                                                                                                    | Au1–C7 <sup>i</sup> 1.991(4)                                                  | Ru1–O2 2.010(3)                            |                                                                                                        |                                                                           |
|                |                                                                                                                                                                    | Au1–C8 2.003(7)                                                               | Ru1–O3 <sup>ii</sup> 2.014(3)              |                                                                                                        |                                                                           |
|                |                                                                                                                                                                    | Au1–C9 2.008(7)<br>i: (2– <i>x</i> , 1– <i>x</i> + <i>y</i> , 5/3– <i>z</i> ) | Ru1–O4 2.020(3)                            |                                                                                                        |                                                                           |
| <b>2</b>       | Ru1–Ru2 2.2665(3)                                                                                                                                                  |                                                                               | Ru1–O1 2.033(2)                            | Ru1–N1 2.263(3)<br>Ru2–N4 <sup>i</sup> 2.264(3)<br>i: ( <i>x</i> –1/2, 1/2– <i>y</i> , 1/2+ <i>z</i> ) | Ru1–Ru2–N4 <sup>i</sup> 175.67(6)<br>Ru2–Ru1–N1 174.96(7)                 |
|                |                                                                                                                                                                    | Au1–C13 1.999(3)                                                              | Ru1–O3 2.024(2)                            |                                                                                                        |                                                                           |
|                |                                                                                                                                                                    | Au1–C14 2.005(3)                                                              | Ru1–O5 2.029(2)                            |                                                                                                        |                                                                           |
|                |                                                                                                                                                                    | Au1–C15 2.001(3)                                                              | Ru1–O7 2.009(2)                            |                                                                                                        |                                                                           |
| <b>3</b>       | Ru1–Ru1 <sup>ii</sup> 2.2734(3)<br>ii: (1/2– <i>x</i> , 1/2– <i>y</i> , 1– <i>z</i> )                                                                              | Au1–C16 1.995(3)                                                              | Ru2–O2 2.022(2)                            | Ru1–N1 2.2728(18)                                                                                      | Ru1 <sup>ii</sup> –Ru1–N1 175.35(5)                                       |
|                |                                                                                                                                                                    |                                                                               | Ru2–O4 2.017(2)                            |                                                                                                        |                                                                           |
|                |                                                                                                                                                                    |                                                                               | Ru2–O6 2.021(2)                            |                                                                                                        |                                                                           |
|                |                                                                                                                                                                    |                                                                               | Ru2–O8 2.023(2)                            |                                                                                                        |                                                                           |
| <b>4</b>       | Ru1–Ru1 <sup>i</sup> 2.2689(5)<br>Ru2–Ru2 <sup>ii</sup> 2.2673(4)<br>i: (1– <i>x</i> , – <i>y</i> , 1– <i>z</i> )<br>ii: (2– <i>x</i> , 2– <i>y</i> , – <i>z</i> ) | Au1–C9 2.000(2)                                                               | Ru1–O1 2.0270(15)                          | Ru1–N1 2.278(2)<br>Ru2–N3 2.283(3)                                                                     | Ru1 <sup>i</sup> –Ru1–N1 173.71(6)<br>Ru2 <sup>ii</sup> –Ru2–N3 172.75(7) |
|                |                                                                                                                                                                    | Au1–C10 1.998(2)                                                              | Ru1–O2 <sup>ii</sup> 2.0253(15)            |                                                                                                        |                                                                           |
|                |                                                                                                                                                                    |                                                                               | Ru1–O3 2.0252(15)                          |                                                                                                        |                                                                           |
|                |                                                                                                                                                                    |                                                                               | Ru1–O4 <sup>ii</sup> 2.0219(15)            |                                                                                                        |                                                                           |
| <b>4</b>       |                                                                                                                                                                    | Au1–C21 1.995(3)                                                              | Ru1–O1 2.0132(10)                          |                                                                                                        |                                                                           |
|                |                                                                                                                                                                    | Au1–C22 1.997(3)                                                              | Ru1–O2 <sup>i</sup> 2.021(2)               |                                                                                                        |                                                                           |
|                |                                                                                                                                                                    | Au1–C23 1.992(3)                                                              | Ru1–O3 2.0192(10)                          |                                                                                                        |                                                                           |
|                |                                                                                                                                                                    | Au1–C24 2.005(3)                                                              | Ru1–O4 <sup>i</sup> 2.0261(19)             |                                                                                                        |                                                                           |
